# Supplementary material for: Influence of Food Taboos and Beliefs on Anaemia among Pregnant Women In Isiolo County, Kenya
Source: Research Square preprint supplement (doi:10.21203/rs.3.rs-109970/v1), 2020-12-02
Supplement: Supplementary file 1 [file eb51c56fed7566f5484a11f5.docx]

## Questionnaire for Sora

## Consent Form

I am SoraGonjoboAgustino, a postgraduate student registered for Masters in public health reproductive health option in Kenyatta University. I am carrying out this study as part of the requirement for Masters Qualification.

**Objectives of Study**

This study aims to gain the understanding of the prevalence of food taboos and beliefs in pregnancy and it is influence on Anaemia among pregnant women in Isiolo County. Particularly the study seeks to address the prevalence of anaemia among antenatal mothers, their level of nutritional knowledge, and foods considered to be a taboo during pregnancy.

**Benefits to participants**

There were no guarantees of any direct or short-term benefit. Pregnant women with any special needs were referred to the health care providers for professional assistance. However, findings from this study are expected to be used in formulating policies that was improve antenatal care in the County.

**Voluntary Participation**

Participation in this research was voluntary. The participants were informed before participation that there would be no direct material or financial benefits for their participation. Participants were not be coerced into participating in this study. The participants were at liberty to opt out of the research at any time of their choice.

**Confidentiality**

All participants in the study we reassured of confidentiality and privacy through conducting of interview in convenient location for all participants. All blood sample results and information collected from participants would be strictly used only for the purpose of the study and everything was done to maintain confidentiality. Personal identifier such as names was not included in the data during the course of the study.

**Risks**

There were limited risks involved since blood sample collection for anaemia was done by experienced lab technologists. However, there was little pain experienced during pricking and participants were kindly requested to bear that pain.

The participants were given the opportunity to ask any questions or concerns about the study from me or the Secretary of the University on the following numbers:

**Sora Gonjobo Agustino**

**Telephone number: 0721548850**

**E-mail:gonjobo@gmail.com**

For any questions pertaining to the rights as a research participant the contact person is:

**The Secretary,**

**Ethics Review Committee,**

**Kenyatta University**

**School of Public Health,**

**P.O. Box: 43844-00100, Nairobi.**

**Telephone number+254 - 020-8710901-19**

**Participant Acknowledgement Statement**

I have read the foregoing information and have had the opportunity to ask questions about it and any questions I have asked have been answered to my satisfaction. I consent voluntarily to be a participant in this study

Name of participant………………………………………………………………………… Signature……………………………………………………………………………………

Date …………………………………………………………………………………………...

**Researcher Statement**

I have accurately read out the information sheet to the potential participant, and to the best of my ability made sure that the participant understands all information. I confirm that the participant was given an opportunity to ask questions about the study, and all the questions asked by the participant have been answered correctly and to the best of my ability. I confirm that the individual has not been coerced into giving consent, and the consent has been given freely and voluntarily**.**

**Name of Researcher……………………………Signature…………………………………**

**Date…………………………………………………………………………………………**

**Potential Risks**

This study posed no physical risks; however, some discussions and questions were personal and emotionally sensitive.

**Data Storage/ Security and Usage**

The participants were informed before the interview that the information to be obtained would be stored electronically and password-protected in a personal computer and access limited to only the researcher and the supervisors because the study was purely for education purpose.

## Study Questionnaire

This questionnaire seeks to collect data on common food taboos and beliefs during pregnancy and their implications on anaemia among pregnant women in Isiolo County. The study was purely academic work and the information obtained was not to use for any other purpose other than academic research. Your participation shall be highly appreciated.

**STUDY TITLE: INFLUENCE OF FOOD TABOOS AND BELIEFS ON ANAEMIA AMONG PREGNANT WOMEN IN ISIOLO COUNTY, KENYA**

**SECTION A: Social Demographic Information**

I**)** Name................................................ (Optional)

ii) Age ................years Nationality.....................................

iii) Do you live in a) Town ( ) b) Village ( )

iv). Marital status

a) Married ( ) b) Window ( ) c) Single ( )

d) Divorced ( )

v.) Living arrangement.

a.) living with nuclear family ( ) b) living with extended family ( )

vi). What is your education level?

1. None ( ) b) Primary ( ) c) Secondary ( ) d) Post secondary ( ) e) University and above ( ) f) Non formal ( )

**SECTION B**

Kindly indicate the extent to which you agree/disagree with the following statements about your knowledge on demographic characteristics and their influence on anaemia among pregnant women:

(Tick where appropriate) **where 1-Strongly Disagree; 2-Disagree; 3- Neutral; 4-Agree; 5-Strongly Agree**

**Cultural beliefs**

| **No** | **Statement** | **Rating** | | | | |
| --- | --- | --- | --- | --- | --- | --- |
| 1-Stronlgy Disagree | 2-Disagree | 3-Neutral | 4-Agree | 5-Stronly Agree |
| 1 | Taboos stipulated on certain foods during pregnancy are attributed by lack of nutritional knowledge. |  |  |  |  |  |
| 2 | Strict cultural diet stipulation mostly hinder pregnant women from eating food rich in iron and protein such as dairy products and liver. |  |  |  |  |  |
| 3 | Cultural taboos have negative effect on the prevalence of anaemia in the whole community |  |  |  |  |  |
| 4 | Cultural taboos generally propagate the occurrence of anaemia in pregnant women as their nutritional needs greatly increase as pregnancy progresses. |  |  |  |  |  |
| 5 | High levels of poverty and illiteracy has led to the dependence of cultural beliefs setting up diets for pregnant women. |  |  |  |  |  |

**LABORATORY FORM**

**a. Haemoglobin concentration g/dl**

a) < 11 g / dl d) b) 11 g / dl or more

**SECTION C**

**Focus Group Discussions**

- Discuss the probable reasons for the prevalence of anaemia in Isiolo County?
- Discuss the general importance of prenatal and antenatal healthcare in eradicating pregnancy anaemia?
- In depth, describe the community’s role in eradicating pregnancy anaemia?
- Should all taboos concerning pregnant women be scrapped? Give clear reasons as to your answer.
